# Supplementary material for: The abundance, biomass, and distribution of ants on Earth
Source: PubMed Central journal article supplement — Proc Natl Acad Sci U S A. 2022 Sep 19;119(40):e2201550119. doi: 10.1073/pnas.2201550119 (PMC9546634; doi:10.1073/pnas.2201550119), 2022-09-19
Supplement: pnas.2201550119.sapp.pdf [file pnas.2201550119.sapp.pdf]

## **Supplementary Information for** The abundance, biomass and distribution of ants on Earth

Patrick Schultheiss, Sabine S. Nooten, Runxi Wang, Mark K. L. Wong, François Brassard, and Benoit Guénard

Corresponding author: Patrick Schultheiss  
Email: ppschultheiss@gmail.com

### **This PDF file includes:**

- Supporting text
- Figures S1 to S4
- Tables S1 to S5
- SI References

### **Other supplementary materials for this manuscript include the following:**

- Datasets S1 to S6

## Extended description of methods

### Literature search (epigaeic ants dataset)

We searched the Scopus database for literature on February 28<sup>th</sup>, 2020, using the search term “Formicidae” and limiting results to 2014 or later. We did not use additional search terms, so as not to limit our results to certain languages. The year 2014 was chosen as studies from earlier years were identified from existing datasets (1-3). The Scopus search returned around 4000 results. Additional searches were performed on the same date in Google Scholar to find relevant studies published in regional scientific journals, foreign languages not well represented in Scopus, academic theses, and government and consultancy reports. As Google Scholar limits the display of results to 1000, we performed these searches year by year from 2014 onwards, leading to a total of 7000 results. Searches for Chinese literature in the China National Knowledge Infrastructure (CNKI) and Airiti Library led to a further 936 results. Overall, we scanned around 12000 results from these literature searches for relevant data, and a further 9300+ publications from before 2014.

### Data acquisition (epigaeic ants dataset)

A study was deemed relevant for our purposes if epigaeic ants were collected with leaf litter extractions or pitfall traps, and if sufficient details were provided to quantify both ant abundance and sampling effort. Studies that collected ants using multiple methods (e.g., leaf litter extractions and pitfall traps, or pitfall traps and hand collections) but did not report separate abundance values for each collection method, could not be used. Data from leaf litter samples were only retained if standard methods were used for ant extraction, (i.e., Winkler or Berlese extractors) and only if the leaf litter was collected without soil. Similarly, pitfall trap data were only retained if standard trapping liquids were used (i.e., alcohol, water with alcohol, detergent, antifreeze or saltwater); they were not retained if the pitfall cups contained attractive substances, only water or no liquid. We also removed data from unusually large (> 12 cm diameter) pitfall cups or from pitfall traps that were left in the field for less than 24 h, as these will not provide representative samples (4, 5).

To obtain a dataset with the highest possible resolution, studies that covered different locations, habitats or methods were conserved as separate entries in our dataset if separate values were provided for ant abundances and sampling effort. In a small number of cases, ant abundances were estimated from data figures if the study did not provide numerical values. Great care was taken to ensure that values reported as abundances were in fact total abundance values, and not based on partial datasets, abundance categories, weighted datasets or occurrences. If a study reported abundances multiple times but the values did not match (e.g., the sum of separate site abundances did not match the reported overall abundance), it was not retained. Geographic location information was entered at the resolution provided in the study. If site locations were only provided in the form of a map or a detailed verbal description, we extracted the approximate geographic coordinates from Google Earth. All coordinates were converted to decimal degrees.

### Data analysis (epigaeic ants dataset)

Entries were assigned to biomes using ArcGIS version 10.2 (6), based on their geographic location and the biome classification of Dinerstein et al. 2017 (7). Our dataset did not contain any entries for the biomes “flooded grassland and savannas”, “tundra”, and “mangroves”, although it should be noted that ants do occur in such habitats (8). For the sake of convenience, we have modified the biome names as listed in Table S1. Nearly all studies provided some additional information on the habitat of sampling sites, and the descriptive terms used by each study were compiled into the dataset. As the terminology of habitat descriptions varied widely, these were later assigned to one of ten habitat categories as summarized in Table S2. Wherever available, descriptions of habitat structure (e.g., height, density or type of vegetation) or site photographs were taken into consideration when assigning habitat categories. Each habitat was split into two sub-categories based on latitude: entries with latitude values between -23.5° and 23.5° were classified as “tropical”, with the remaining entries classified as “extra-tropical”.

For pitfall trap data entries, we assessed whether pitfall trap diameter is a confounding factor. Previous studies have shown that pitfall trap diameter can influence species richness estimates and, to a lesser degree, ant abundance estimates (4, 9). We did not find a significant correlation between pitfall trap

diameter and standardized abundance (Figure S2; Pearson's  $r = -0.023$ ,  $P = 0.381$ ), and therefore did not consider this measure in any of our analyses. We did, however, limit the opening size of the pitfall traps included in our study to a maximum of 12 cm.

The epigaeic dataset was used to calculate biome-level and habitat-level epigaeic ant abundances, which are shown in Figs. 3 and 4, respectively, in the main manuscript; Table S3 gives the numerical values of weighted means and standard errors of the mean for each category. Only leaf litter-derived biome means were used for extrapolations to global biome area.

#### Extrapolation to global ant abundance and biomass

The global abundance of epigaeic ants, actively foraging in the leaf litter stratum, was extrapolated from biome-wide mean densities of leaf litter ants as laid out in the main manuscript. To arrive at a total global ant abundance, we additionally estimated the density of foraging ants in the arboreal stratum, and the proportion of ants that are not actively foraging.

The ant faunas from other vegetation strata have received much less research attention, and few studies directly compare ant abundances of different strata at the same location (but see (10-12)). Published values of arboreal ant densities are presented in Table S4, grouped by regional categories (tropical, subtropical, temperate) and including sampling effort and weighted means. Data on subterranean ant abundances were judged too scarce and lacking in standardization of sampling methods for inclusion in this study (13).

The sampling methods considered here (leaf litter extractions and arboreal fogging) only capture ants that have left the nest to forage, while the majority of individuals remain inside the nest. The proportion of workers performing foraging duties varies between species and can change with season and colony size (14, 15). Published estimates of the forager force in different species are compiled in Table S5.

To calculate global ant biomass, we compiled measurements of mean individual dry weight from 534 species from the published literature. Where these were reported as wet weight, we converted them to dry weight by assuming a water content of 70% (16). These values are presented in the supplementary Dataset S4.

#### **Alternative calculations of global ant abundance and biomass**

Our estimate of global epigaeic ant abundance is based on a large empirical dataset. The estimate of global arboreal abundance is based on a smaller, but likewise empirical dataset. Following the methods described above (and in the main manuscript), we arrive at the two estimates

$$\text{global epigaeic ant abundance} = 3.02 \times 10^{15} (\pm 0.74 \times 10^{15})$$

$$\text{global arboreal ant abundance} = 1.34 \times 10^{15} (\pm 0.36 \times 10^{15}).$$

However, to extrapolate from these values to total global ant abundance and biomass, we use two assumptions that are difficult to verify and might introduce a considerable amount of uncertainty to our estimates. Here, we aim to show how modifying these assumptions within boundaries that could be considered realistic will affect our final estimates.

Our first assumption is that only ~22% of individual ants in a colony are involved in foraging and are captured by our sampling methods. Thus, using

$$\text{global ant abundance} = (\text{epigaeic abundance} + \text{arboreal abundance}) \times 100/22$$

we estimate

$$\text{global ant abundance} = (3.02 \times 10^{15} + 1.34 \times 10^{15}) \times 4.55 = \mathbf{19.8 \times 10^{15}} (\pm 5 \times 10^{15}).$$

While our estimated proportion of ~22% foragers is based on published values (Table S5) it remains unclear how representative these values are for the following reasons. The proportion of an ant colony performing foraging duties varies not only between species, but can also fluctuate greatly over time, the colony life cycle and the seasons (14, 15). In addition, the methods of forager force estimation vary between studies, but commonly involve the marking of all foraging ants over several days; in contrast,

the sampling methods considered for abundance estimates in this study (leaf litter extractions and arboreal fogging) provide more or less instantaneous ‘snapshots’ of the active ant community. Our average value of ~22% foragers may therefore reflect the upper limit, as these foragers will not be outside of the nest at the same time. If one were to consider a lower forager proportion of ~5% as more realistic, our abundance estimate would be raised considerably to

$$\text{global ant abundance} = (3.02 \times 10^{15} + 1.34 \times 10^{15}) \times 20 = \mathbf{87.2 \times 10^{15}} (\pm 22 \times 10^{15}).$$

Our second assumption is that a single average (and representative) ant has a dry carbon weight of 0.62 mg C. Thus, using

$$\text{biomass [Mt C]} = \text{abundance} \times 0.62 \times 10^{-15}$$

we estimate

$$\text{global ant biomass [Mt C]} = 19.8 \times 10^{15} \times 0.62 \times 10^{-15} = \mathbf{12.3 \text{ Mt C}} (\pm 3.1)$$

or, if we follow the alternative assumption of a 5% forager proportion

$$\text{global ant biomass [Mt C]} = 87.2 \times 10^{15} \times 0.62 \times 10^{-15} = \mathbf{54.1 \text{ Mt C}} (\pm 13.6).$$

Our estimated body weight of 0.67 mg C for each ant is derived by taking the arithmetic mean of 534 species-level mean dry body mass values we have collated (see supplementary Dataset S1), but again it remains unclear whether this value is representative of the global ant fauna. First, our list of species represents a small subset of all ant species on Earth (about 16 000 named species and subspecies with possibly as many undescribed ones (17)). Second, small-bodied ants may be much more abundant than large-bodied ants (18). And third, within a community there are often more small ant species than large ones. Should this last assumption apply to our global ant abundance dataset, a reasonable alternative method of biomass estimation could use the geometric mean of species-level body mass values, rather than the arithmetic mean we use above. From our ant body mass dataset, we calculate the geometric mean of 399 species-level values (one study only reports an overall arithmetic mean of 135 species (19) and cannot be used) as 0.36 mg dry weight, or 0.18 mg dry carbon weight. Thus, our original biomass estimate would be amended to

$$\text{global ant biomass [Mt C]} = 19.8 \times 10^{15} \times 0.18 \times 10^{-15} = \mathbf{3.6 \text{ Mt C}} (\pm 0.9)$$

or, if we follow the alternative assumption of a 5% forager proportion

$$\text{global ant biomass [Mt C]} = 87.2 \times 10^{15} \times 0.18 \times 10^{-15} = \mathbf{15.8 \text{ Mt C}} (\pm 4).$$

Overall, these calculations provide a range of estimates (abundance: ~20–87 × 10<sup>15</sup>, biomass: ~4–54 Mt C) which are based on our current knowledge and available data. The upper range of the global ant biomass estimates is on a level with the estimated global human biomass of ~60 Mt C (16). Nonetheless, our study clearly highlights several knowledge gaps in the basic biology of ants (e.g., in terms of body weight and foraging activity patterns) and of their ecological coverage (particular biomes, habitats or strata that are poorly covered). Most likely, similar knowledge gaps exist for other insect groups as well.

### Previous estimates of global ant abundance and biomass

The global abundance of ants has previously been estimated by Hölldobler and Wilson (20, 21), along with their biomass. Recently, a further ant biomass estimate has been published by Tuma et al. (22). The methods of estimation in these studies deviate considerably from the method employed here and are briefly outlined below for better ease of comparison. It is worth noting that biomass estimates are variously reported as wet (live) weight, dry weight, or dry carbon weight. Insects are generally considered to have a dry weight of 30% wet weight, and a carbon weight of 50% dry weight (16). We have recalculated most biomass estimates in the section below to be in megatons of dry carbon, or Mt C.

Hölldobler and Wilson’s aim is to provide a very rough estimate; this is not intended to reflect accurate values, but rather a general understanding of the global importance and ecological pervasiveness of ants. Their starting point is an estimate of the entire global insect population by C. B. Williams (23). Williams’ estimate is also intended as a thought experiment, rather than an accurate reflection of reality.

Citing data from a series of insect extractions from the top few inches of soil at Rothamsted Experimental Station in southeast England, which provide a possible population density of about 5 to 10 insects / cm<sup>2</sup>, Williams performs a simple extrapolation to the entire global land surface and arrives at a final value of about 10<sup>18</sup> total insects on Earth. In their ant estimate from 1994 (20), Hölldobler and Wilson suggest that globally, about 1% of these insects are ants (10<sup>16</sup>), and that ants have an average weight of 1–5 mg, although they do not specify if this is dry or wet weight. Considering it to be dry weight, these calculations lead to a global ant dry biomass of 10–50 Mt, equivalent to 5–25 Mt C (if wet weight was intended, these values would be 70% lower). They continue that “all ants in the world taken together weigh about as much as all human beings”, without stating any specific value. Global human biomass has recently been estimated at ~43 Mt C (2005, adults only) (24), and at ~60 Mt C (2015, all humans) (16). Thus, we see that the estimates of ant biomass range from 10% to about 50% of human biomass, even when adjusted to the human population in 1994, which was 77% of the population in 2015 (25).

In a revised estimate from 2009 (21), Hölldobler and Wilson assume a global ant population of 10<sup>15</sup> to 10<sup>16</sup> (again based on Williams’ estimate (23)), an average ant dry weight of 0.5 – 1 mg and an average human dry weight of about 10 kg. Following these calculations through for a suggested ant population of 10<sup>16</sup>, we arrive at a range for global ant dry biomass from 5 Mt (0.5-mg ants) to 10 Mt (1-mg ants), or 2.5–5 Mt C. Using the estimated global population in 2009 (25) and the stated 10 kg dry weight per human, we arrive at a global human dry biomass of 69 Mt, or 35 Mt C. A more recent estimate puts this value at ~60 Mt C for 2015 (16). We see that using the values provided by Hölldobler and Wilson (2009), global ant biomass would encompass only around 7–15% of human biomass; using the more recent estimate of human biomass, the proportion of ants to humans shrinks to about 5–10%. Admittedly, Hölldobler and Wilson themselves highlight that their stated value for global ant abundance of 10<sup>16</sup> individuals is not empirical, and that values from as low as 10<sup>15</sup> to as high as 10<sup>17</sup> (i.e., spanning two orders of magnitude) may be just as realistic (21). So while their summarizing statement that “ants and people have (again, very roughly) the same global biomass” (21) is – in a way – validated, it is easily misrepresented when taken out of context. We note that the estimated values for ant biomass are in fact lower than human biomass, and that it would be more truthful to add the qualifier that the two may be *within the same order of magnitude*.

More recently, Tuma et al. published an estimate of ant dry biomass in 2020 (22), using an entirely different approach. They perform a straightforward calculation in the following manner: “Biomass of ants was assessed by first estimating the average proportion of arthropod biomass that is ant biomass from Dial et al. (2006) and Stork (1996) [(0.52 + 0.20)/2 = 0.36]. This value was then multiplied by the biomass of all terrestrial arthropods taken from Bar-On, Phillips & Milo (2018) [0.36 × 200 Mt = 70 Mt]”, which is dry carbon biomass. Their estimate for the proportion of ant biomass is thus derived from two empirical studies (26, 27). However, both were performed in lowland rainforests of Indonesia and it remains doubtful if this proportion is representative of other parts of the world, especially since Dial et al. (26) investigated tropical tree canopies where ants are known to be particularly abundant (28). The biomass estimate of all terrestrial arthropods is taken directly from the study of Bar-On et al. (16). This provides a census of all biomass on Earth, of which terrestrial arthropods form a very small part. Bar-On et al. follow two different approaches for their estimate, which they term the average biomass densities method and the average carbon content method. For the first, they compile a list of values from the literature, estimate mean biomass densities of arthropods in litter, soil, and canopies, sum these densities and apply them to the entire global ice-free land area. For the second method, they calculate the carbon content of a characteristic arthropod and multiply this value by an estimate for the total number of arthropods which, for want of alternatives, is the (highly uncertain) extrapolation of English insect densities published by C. B. Williams (23). The results of the two methods are then averaged to form the final ‘best estimate’ of terrestrial arthropod biomass, which is reported as 200 Mt of dry carbon. Bar-On et al. highlight that available biomass data on terrestrial arthropods is limited and that comprehensive datasets are lacking. Indeed, all their arthropod biomass values are derived from a total of 10 studies, encompassing a variety of sampling methodologies, sampling efficiencies and geographical biases. As a result of this lack of more comprehensive data, Bar-On et al. gauge the uncertainty of their terrestrial arthropods estimate to be around 15-fold (16). Therefore, this uncertainty applies equally to the estimate of ant biomass in Tuma et al. (22), as their calculations are directly based on the value from Bar-On et al.

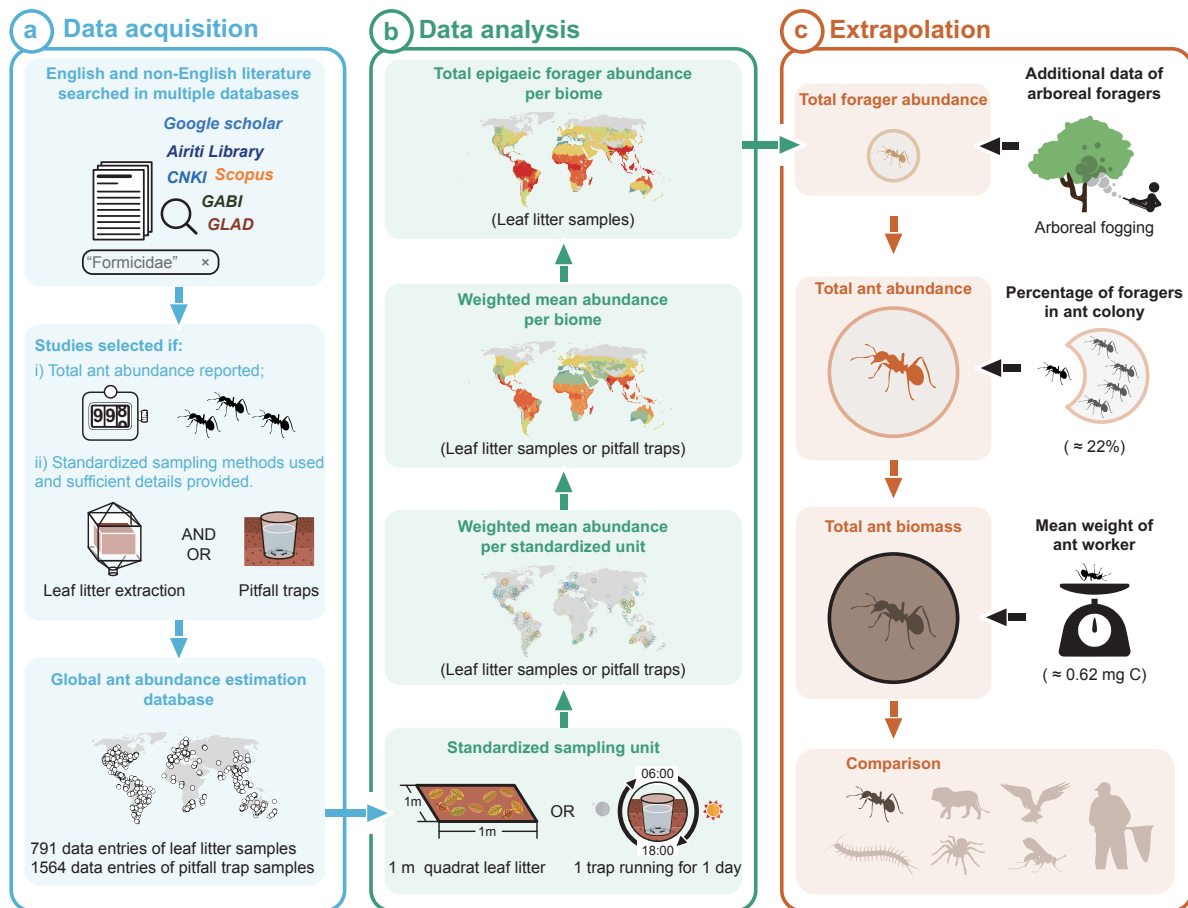

**Fig. S1.** A graphical description of the methods, summarizing the acquisition of published ant abundance values, the analysis of biome- and habitat-wide abundances, and the extrapolation for estimating the global ant population and their biomass.

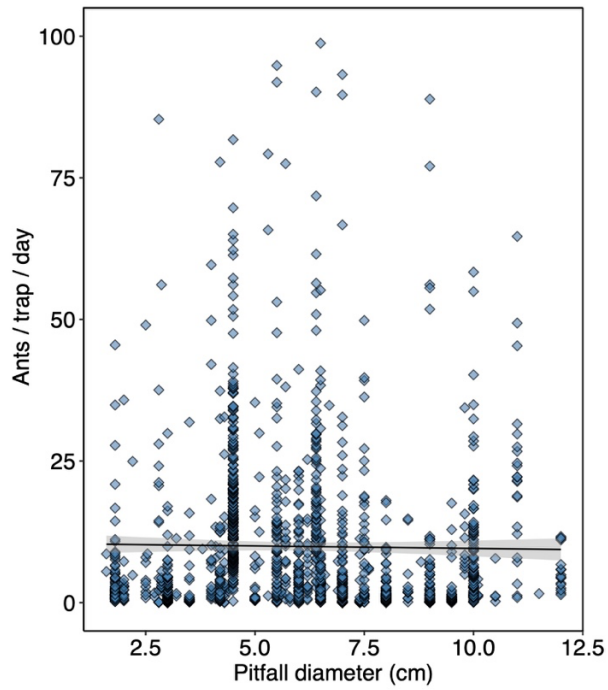

**Fig. S2.** Plot showing the pitfall trap diameter and the mean abundance per sampling unit for each data entry. Entries with diameter > 12 cm have been excluded, the y-axis has been truncated for readability, the black line shows the best linear fit and the gray shaded area the 95% confidence interval. No correlation is evident.

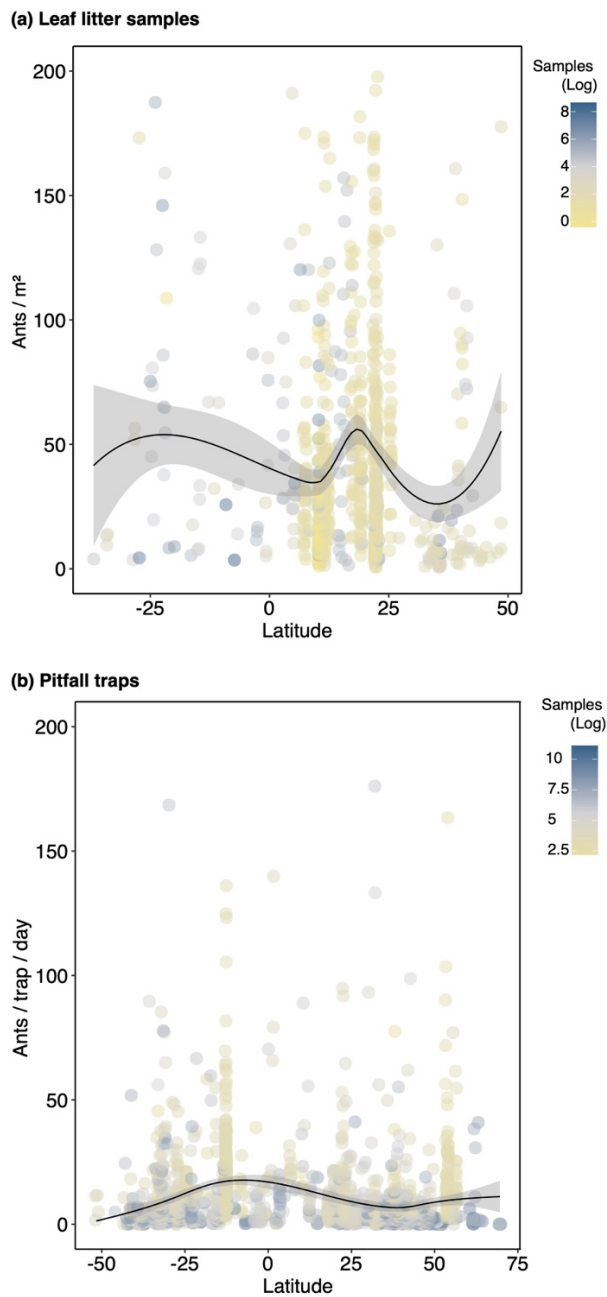

**Fig. S3.** Plots showing ant abundances derived from (a) leaf litter samples and (b) pitfall traps, in relation to latitudinal position. Datapoints show values per entry colored by sample size (natural log scale), the black line shows the smoothed conditional means (using 'geom\_smooth' in 'ggplot2'), and the gray shaded area indicates the 95% confidence intervals.



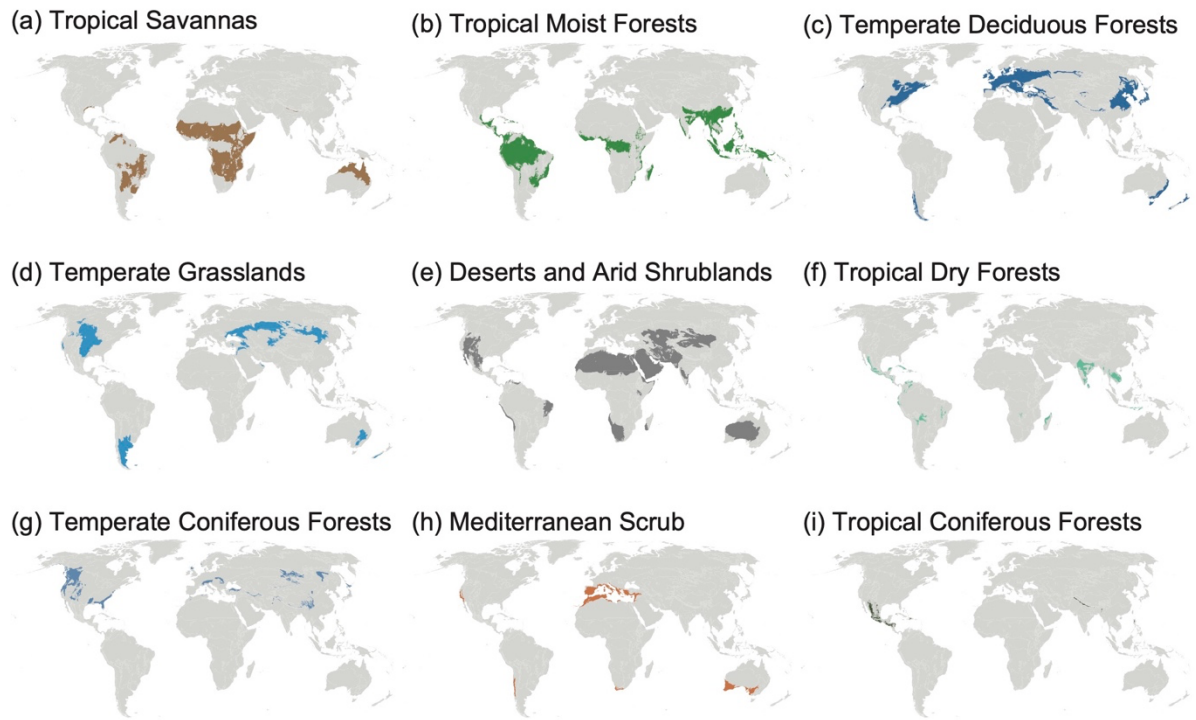

**Fig. S4.** Reference maps showing the global distribution of the biomes considered in our study. The biome definition follows Dinerstein et al. 2017 (7).

**Table S1.** Renaming of biomes for simplification within our text and figures. The original biome names and the area of each biome are taken from Dinerstein et al. 2017 (7).

| <b>Original biome</b>                                         | <b>Renamed as:</b>           | <b>Area (km<sup>2</sup>)</b> |
|---------------------------------------------------------------|------------------------------|------------------------------|
| Tropical and subtropical moist broadleaf forests              | Tropical Moist Forests       | 19,774,647                   |
| Tropical and subtropical dry broadleaf forests                | Tropical Dry Forests         | 3,010,214                    |
| Tropical and subtropical coniferous forests                   | Tropical Coniferous Forests  | 707,967                      |
| Temperate broadleaf and mixed forests                         | Temperate Deciduous Forests  | 12,830,687                   |
| Temperate coniferous forests                                  | Temperate Coniferous Forests | 4,084,509                    |
| Boreal forests/Taiga                                          | Boreal Forests               | 15,126,637                   |
| Tropical and subtropical grasslands, savannas, and shrublands | Tropical Savannas            | 20,178,128                   |
| Temperate grasslands, savannas, and shrublands                | Temperate Grasslands         | 10,101,955                   |
| Flooded grasslands and savannas                               | (no data)                    | -                            |
| Montane grasslands and shrublands                             | Montane Grasslands           | 5,187,278                    |
| Tundra                                                        | (no data)                    | -                            |
| Mediterranean forests, woodlands, and scrub                   | Mediterranean Scrub          | 3,221,359                    |
| Deserts and xeric shrublands                                  | Deserts and Arid Shrublands  | 27,888,601                   |
| Mangroves                                                     | (no data)                    | -                            |

**Table S2.** Grouping of habitat descriptions into habitat categories.

| <b>Habitat category</b> | <b>Examples of habitat as described in study</b>                                                                  |
|-------------------------|-------------------------------------------------------------------------------------------------------------------|
| Forest                  | Primary forest, secondary forest, oak forest, woodland, rainforest, Jarrah, pine forest (natural), gallery forest |
| Savanna                 | Pine barren, open savanna woodland, aspen parkland, Cerrado                                                       |
| Shrubland               | Scrubland, thicket, young forest succession, bushland, heath, Chaparral                                           |
| Grassland               | Prairie, meadow, pasture, steppe, grass                                                                           |
| Wetland                 | Swamp, bog, marsh                                                                                                 |
| Plantation forest       | Pine forest (planted), rubber plantation, <i>Eucalyptus</i> (planted), orchard                                    |
| Plantation crop         | Cropland, rice field, agriculture                                                                                 |
| Urban greenspace        | Urban park, urban golf course, garden                                                                             |
| No vegetation           | Bare ground, rock, bare sand                                                                                      |
| Multiple habitats       | Any combination of above categories                                                                               |

**Table S3.** Ant densities from leaf litter and pitfall trap samples for (A) biomes and (B) habitats, showing weighted mean per standard unit (unit) and weighted standard error of the mean (SEM). A standard unit is 1 m<sup>2</sup> for leaf litter samples, and 1 24-h pitfall cup for pitfall trap samples.

| (A) Biome                    | Leaf litter         |                   |                  |                 | Pitfall traps       |                   |                  |                 |
|------------------------------|---------------------|-------------------|------------------|-----------------|---------------------|-------------------|------------------|-----------------|
|                              | <i>n</i><br>entries | <i>n</i><br>units | weighted<br>mean | weighted<br>SEM | <i>n</i><br>entries | <i>n</i><br>units | weighted<br>mean | weighted<br>SEM |
| Boreal Forest                | -                   | -                 | -                | -               | 63                  | 262451            | 2.32             | 0.81            |
| Deserts and Arid Shrublands  | 12                  | 120               | 7.51             | 1.29            | 150                 | 96975             | 11.09            | 1.68            |
| Mediterranean Scrub          | 5                   | 80                | 10.28            | 1.73            | 269                 | 237255            | 6.65             | 0.60            |
| Montane Grasslands           | -                   | -                 | -                | -               | 22                  | 59758             | 4.89             | 1.66            |
| Tropical Savannas            | 8                   | 370               | 49.23            | 26.11           | 304                 | 120480            | 7.12             | 0.69            |
| Temperate Deciduous Forests  | 61                  | 2379              | 24.46            | 4.26            | 315                 | 911053            | 1.86             | 0.61            |
| Temperate Coniferous Forests | 29                  | 406               | 21.77            | 3.54            | 58                  | 231325            | 2.12             | 0.77            |
| Temperate Grasslands         | 5                   | 375               | 23.88            | 2.49            | 101                 | 68850             | 5.05             | 0.89            |
| Tropical Coniferous Forests  | 4                   | 400               | 28.28            | 11.38           | 22                  | 2496              | 12.47            | 4.07            |
| Tropical Dry Forests         | 91                  | 370               | 58.04            | 4.31            | 5                   | 997               | 10.20            | 3.33            |
| Tropical Moist Forests       | 576                 | 22313             | 47.68            | 2.68            | 255                 | 175438            | 6.01             | 0.53            |
| <b>(B) Habitat</b>           |                     |                   |                  |                 |                     |                   |                  |                 |
| Forest                       | 606                 | 22201             | 47.81            | 2.62            | 521                 | 759082            | 3.41             | 0.43            |
| Grassland                    | 6                   | 446               | 17.09            | 3.35            | 189                 | 371078            | 3.41             | 0.54            |
| Multiple habitats            | 7                   | 2224              | 27.82            | 16.10           | 56                  | 347665            | 3.69             | 1.23            |
| No vegetation                | -                   | -                 | -                | -               | 9                   | 2396              | 5.09             | 3.48            |
| Plantation crop              | 2                   | 90                | 30.50            | 9.64            | 66                  | 94511             | 2.95             | 0.74            |
| Plantation forest            | 122                 | 1398              | 35.50            | 2.93            | 73                  | 55516             | 2.59             | 0.50            |
| Savanna                      | 3                   | 125               | 26.34            | 4.03            | 278                 | 52177             | 11.53            | 0.87            |
| Shrubland                    | 38                  | 282               | 11.43            | 3.59            | 265                 | 196370            | 5.92             | 0.90            |
| Urban greenspace             | 2                   | 24                | 88.71            | 45.05           | 53                  | 262768            | 1.78             | 0.46            |
| Wetland                      | 5                   | 23                | 35.35            | 14.69           | 54                  | 25515             | 8.90             | 6.22            |

**Table S4.** Published values of arboreal ant densities. We only considered studies that sampled ants by arboreal fogging, allowing for the standardization of values to sampling area. In several cases, the number of ants per m<sup>2</sup> was not reported in the study but could be calculated from the available data.

| Location                                | Region   | Vegetation                    | Sample area (m <sup>2</sup> ) | Ants / m <sup>2</sup> | References |
|-----------------------------------------|----------|-------------------------------|-------------------------------|-----------------------|------------|
| Brazil, Manaus                          | tropical | Lowland rainforest            | 36                            | 34.25                 | (29)       |
| Brazil, Manaus                          | tropical | Inundation rainforest         | 76.8                          | 21.14                 | (30)       |
| Brazil, Manaus                          | tropical | Lowland rainforest            | 38.4                          | 85.9                  | (30)       |
| Brazil, Pantanal                        | tropical | Inundation palm forest        | 99                            | 25.19                 | (31)       |
| Brazil, Pantanal                        | tropical | Inundation rainforest         | 120                           | 24.7                  | (32)       |
| Brazil, Pantanal                        | tropical | Inundation rainforest         | 86                            | 81.4                  | (33)       |
| Peru, Manu NP                           | tropical | Lowland rainforest            | 93.6                          | 669.23                | (34)       |
| Colombia, Gorgona NP                    | tropical | Lowland rainforest            | 64                            | 70.59                 | (35)       |
| Malaysia, Sabah, Danum Valley           | tropical | Lowland rainforest            | 6                             | 805.55                | (26)       |
| Malaysia, Sabah, Danum Valley           | tropical | Lowland rainforest            | 450                           | 10.04                 | (36)       |
| Malaysia, Sabah, Danum Valley           | tropical | Lowland rainforest            | 200                           | 106.98                | (37)       |
| Brunei (Borneo)                         | tropical | Inundation rainforest         | 200                           | 22.15                 | (38)       |
| Brunei (Borneo)                         | tropical | Lowland rainforest            | 30                            | 7.64                  | (39)       |
| Australia, Cape Tribulation             | tropical | Lowland rainforest            | 66                            | 17                    | (39)       |
| Australia, Eungella NP                  | tropical | Upland rainforest             | 22.5                          | 1.4                   | (39)       |
| Australia, Atherton Tablelands          | tropical | Seasonal vine forest          | 33                            | 0.6                   | (39)       |
| New Caledonia, Rivière Bleue            | tropical | Evergreen forest              | 180                           | 3.84                  | (40)       |
| Indonesia, Seram                        | tropical | Lowland rainforest            | 10                            | 580.9                 | (11)       |
| Indonesia, Sumatra                      | tropical | Rain- & plantation forest     | 1536                          | 49.9                  | (41)       |
| India, Western Ghats                    | tropical | Lowland rainforest            | 50                            | 16.86                 | (42)       |
| Uganda, Bodongo Forest                  | tropical | Different forest types        | 976                           | 37.98                 | (43)       |
| Ghana                                   | tropical | Lowland rainforest            | 144*                          | 14.83                 | (44)       |
| Ghana                                   | tropical | Rainforest & cocoa plantation | 95                            | 220.07                | (44)       |
| Ghana, Kade                             | tropical | Cocoa plantation              | 375                           | 120.84                | (45)       |
| Cameroon, Mbalmayo Forest               | tropical | Plantation forest             | 650                           | 135.6                 | (46)       |
| Costa Rica, Central Valley              | tropical | Coffee plantation             | 156                           | 12.77                 | (47)       |
| Australia, Kununurra                    | tropical | Mango plantation              | 250                           | 68.58                 | (45)       |
| Australia, Mt. Glorious                 | subtrop. | Mesophyll vine forest         | 100*                          | 4                     | (45)       |
| Australia, Brisbane                     | subtrop. | Rainforest                    | 168                           | 0.67                  | (48)       |
| Australia, Lamington NP                 | subtrop. | Forest                        | 61.5                          | 8.6                   | (39)       |
| Australia, Werrikimbe NP                | subtrop. | <i>Nothofagus</i> forest      | 85                            | 9.12                  | (39)       |
| Australia, Styx River                   | subtrop. | <i>Nothofagus</i> forest      | 25                            | 7.4                   | (39)       |
| South Africa                            | subtrop. | Parkland                      | 90                            | 15.48                 | (49)       |
| South Africa, Southern Cape             | subtrop. | Forest                        | 1136.4                        | 1.03                  | (50)       |
| <b>weighted mean (trop. + subtrop.)</b> |          |                               |                               | <b>54.9</b>           |            |
| <b>weighted SEM (trop + subtrop.)</b>   |          |                               |                               | <b>14.9</b>           |            |
| Australia, Victoria                     | temp.    | Rainforest                    | 55                            | 3.2                   | (39)       |
| Australia, Dryandra & Karragullen       | temp.    | <i>Eucalyptus</i> woodland    | 275*                          | 3.06                  | (45)       |
| Great Britain                           | temp.    | Parkland                      | 90                            | 0.64                  | (49)       |
| <b>weighted mean (temperate)</b>        |          |                               |                               | <b>2.56</b>           |            |
| <b>weighted SEM (temperate)</b>         |          |                               |                               | <b>0.58</b>           |            |

\*) only lower canopy sampled

**Table S5.** Published estimates of the proportion of worker ants engaged in foraging, expressed as a percentage of the colony total; the methods used for estimation differ between studies. The study by Chew (1959) (51), which provides additional values for *Novomessor cockerelli*, *Myrmecocystus mimicus* and *Pogonomyrmex occidentalis*, was not included here as its estimates are considered unreliable (52).

| <b>Ant species</b>               | <b>Foragers (%)</b> | <b>References</b> |
|----------------------------------|---------------------|-------------------|
| <i>Camponotus pennsylvanicus</i> | 10                  | (53)              |
| <i>Camponotus herculeanus</i>    | 20                  | (52)              |
| <i>Formica fusca</i>             | 20                  | (52)              |
| <i>Formica exsectoides</i>       | 20                  | (52)              |
| <i>Formica polyctena</i>         | 43; 25              | (54, 55)          |
| <i>Monomorium floricola</i>      | 24                  | (56)              |
| <i>Monomorium pharaonis</i>      | 40.5                | (56)              |
| <i>Odontomachus brunneus</i>     | 77                  | (57)              |
| <i>Pogonomyrmex badius</i>       | 10; 20              | (14, 58)          |
| <i>Pogonomyrmex salinus</i>      | 7.7                 | (59)              |
| <i>Pogonomyrmex montanus</i>     | 22.9                | (60)              |
| <i>Pogonomyrmex subnitidus</i>   | 19.4                | (60)              |
| <i>Pogonomyrmex rugosus</i>      | 18.4                | (60)              |
| <i>Pogonomyrmex californicus</i> | 10                  | (61)              |
| <i>Pogonomyrmex occidentalis</i> | 10                  | (62)              |
| <i>Pogonomyrmex mendozanus</i>   | 11.5                | (63)              |
| <i>Pogonomyrmex inermis</i>      | 15                  | (63)              |
| <i>Pogonomyrmex rastratus</i>    | 8.5                 | (63)              |
| <i>Solenopsis invicta</i>        | 50                  | (15)              |
| <i>Temnothorax rugatulus</i>     | 9.8                 | (64)              |
| <b>mean</b>                      | <b>22.2</b>         |                   |

## SI References

1. H. Gibb *et al.*, A global database of ant species abundances. *Ecology* **98**, 883-884 (2017).
2. B. Guénard, V. Perrichot, E. P. Economo, Integration of global fossil and modern biodiversity data reveals dynamism and stasis in ant macroecological patterns. *J. Biogeogr.* **42**, 2302-2312 (2015).
3. B. Guénard, M. D. Weiser, K. Gómez, N. Narula, E. P. Economo, The Global Ant Biodiversity Informatics (GABI) database: synthesizing data on the geographic distribution of ant species (Hymenoptera: Formicidae). *Myrmecol. News* **24**, 83-89 (2017).
4. M. Abensperg-Traun, D. Steven, The effects of pitfall trap diameter on ant species richness (Hymenoptera: Formicidae) and species composition of the catch in a semi-arid eucalypt woodland. *Aust. J. Ecol.* **20**, 282-287 (1995).
5. B. T. Bestelmeyer *et al.*, "Field techniques for the study of ground-dwelling ants" in *Ants: standard methods for measuring and monitoring biodiversity*, D. Agosti, J. D. Majer, L. E. Alonso, T. R. Schultz, Eds. (Smithsonian Institution Press, Washington and London, 2000), chap. 9, pp. 122-144.
6. ESRI (2020) ArcGIS: Release 10.2. (Environmental Systems Research Institute, Redlands, CA).
7. E. Dinerstein *et al.*, An ecoregion-based approach to protecting half the terrestrial realm. *Bioscience* **67**, 534-545 (2017).
8. M. G. Nielsen, Ants (Hymenoptera: Formicidae) of mangrove and other regularly inundated habitats: life in physiological extreme. *Myrmecol. News* **14**, 113-121 (2011).
9. A. Borgelt, T. R. New, Pitfall trapping for ants (Hymenoptera, Formicidae) in mesic Australia: the influence of trap diameter. *J. Insect Conserv.* **9**, 219-221 (2005).
10. J. T. Longino, N. M. Nadkarni, A comparison of ground and canopy leaf litter ants (Hymenoptera: Formicidae) in a neotropical montane forest. *Psyche* **97**, 81-93 (1990).
11. N. E. Stork, M. J. D. Brendell, "Arthropod abundance in lowland rain forest of Seram" in *Natural history of Seram*, I. D. Edwards, A. A. Macdonald, J. Proctor, Eds. (Intercept, Andover, 1993), chap. 7, pp. 115-130.
12. S. P. Yanoviak, M. Kaspari, Community structure and the habitat templet: ants in the tropical forest canopy and litter. *Oikos* **89**, 259-266 (2000).
13. M. K. L. Wong, B. Guénard, Subterranean ants: summary and perspectives on field sampling methods, with notes on diversity and ecology (Hymenoptera: Formicidae). *Myrmecol. News* **25**, 1-16 (2017).
14. C. L. Kwapich, W. R. Tschinkel, Demography, demand, death, and the seasonal allocation of labor in the Florida harvester ant (*Pogonomyrmex badius*). *Behav. Ecol. Sociobiol.* **67**, 2011-2027 (2013).
15. W. R. Tschinkel, The organization of foraging in the Fire Ant, *Solenopsis invicta*. *J. Insect Sci.* **11**, 26 (2011).
16. Y. M. Bar-On, R. Phillips, R. Milo, The biomass distribution on Earth. *P. Natl. Acad. Sci. USA* **115**, 6506-6511 (2018).
17. B. Bolton, An online catalog of the ants of the world. Available from: <https://antcat.org>. (accessed 01.05.2022)
18. M. Kaspari, M. D. Weiser, Energy, taxonomic aggregation, and the geography of ant abundance. *Ecography* **35**, 65-72 (2012).
19. M. Kaspari, M. D. Weiser, The size-grain hypothesis and interspecific scaling in ants. *Funct. Ecol.* **13**, 530-538 (1999).
20. B. Hölldobler, E. O. Wilson, *Journey to the ants* (Harvard University Press, Cambridge, Mass., 1994).
21. B. Hölldobler, E. O. Wilson, *The superorganism* (W.W. Norton & Co., New York, 2009).
22. J. Tuma, P. Eggleton, T. M. Fayle, Ant-termite interactions: an important but under-explored ecological linkage. *Biol. Rev.* **95**, 555-572 (2020).
23. C. B. Williams, The range and pattern of insect abundance. *Am Nat* **94**, 137-151 (1960).
24. S. C. Walpole *et al.*, The weight of nations: an estimation of adult human biomass. *BMC Public Health* **12**, 439 (2012).
25. United Nations, Department of Economic and Social Affairs, Population Division (2019) World Population Prospects 2019. (Online Edition).
26. R. J. Dial, Arthropod abundance, canopy structure, and microclimate in a Bornean lowland tropical rain forest. *Biotropica* **38**, 643-652 (2006).

27. N. E. Stork, "Tropical forest dynamics: the faunal components" in Tropical Rainforest Research - Current Issues, D. S. Edwards, W. E. Booth, S. C. Choy, Eds. (Springer, Dordrecht, 1996), 10.1007/978-94-009-1685-2\_1, pp. 1-20.
28. D. W. Davidson, S. C. Cook, R. R. Snelling, T. H. Chua, Explaining the abundance of ants in lowland tropical rainforest canopies. *Science* **300**, 969-972 (2003).
29. J. Adis, A. Y. Harada, C. R. V. d. Fonseca, W. Paarmann, J. A. Rafael, Arthropods obtained from the Amazonian tree species "Cupiuba" (*Goupia glabra*) by repeated canopy fogging with natural pyrethrum. *Acta Amazon.* **28**, 273-283 (1998).
30. J. Adis, Y. D. Lubin, G. G. Montgomery, Arthropods from the canopy of inundated and terra firme forests near Manaus, Brazil, with critical considerations on the pyrethrum-fogging technique. *Studies on Neotropical Fauna and Environment* **19**, 223-236 (1984).
31. L. D. Battirola, J. Adis, M. I. Marques, F. H. O. Silva, Comunidade de artrópodes associada à copa de *Attalea phalerata* Mart. (Arecaceae) durante o período de cheia no Pantanal de Poconé, MT. *Neotrop. Entomol.* **36**, 640-651 (2007).
32. L. Yamazaki, V. F. Vindica, M. I. Marques, L. D. Battirola, Arthropods associated with *Callisthene fasciculata* (Vochysiaceae) canopy in the Pantanal of Mato Grosso, Brazil. *Revista Colombiana de Entomología* **46** (2020).
33. M. I. Marques, J. Adis, G. B. Santos, L. D. Battirola, Terrestrial arthropods from tree canopies in the Pantanal of Mato Grosso, Brazil. *Rev. Bras. Entomol.* **50**, 257-267 (2006).
34. J. E. Tobin, Competition and coexistence of ants in a small patch of rainforest canopy in Peruvian Amazonia. *J. N. Y. Entomol. Soc.* **105**, 105-112 (1997).
35. P. C. Ulloa, S. Valdés-Rodríguez, A. Hurtado-Giraldo, M. C. Pimienta, Hormigas arbóreas del Parque Nacional Natural Gorgona (Pacífico de Colombia). *Rev. Biol. Trop.* **62**, 277-287 (2014).
36. E. S. Widodo, T. Naito, M. Mohamed, Y. Hashimoto, Effects of selective logging on the arboreal ants of a Bornean rainforest. *Entomol. Sci.* **7**, 341-349 (2004).
37. K. M. Yusah, W. A. Foster, Tree size and habitat complexity affect ant communities (Hymenoptera: Formicidae) in the high canopy of Bornean rain forest. *Myrmecol. News* **23**, 15-23 (2016).
38. N. E. Stork, The composition of the arthropod fauna of Bornean lowland rain forest trees. *J. Trop. Ecol.* **7**, 161-180 (1991).
39. J. Majer, R. L. Kitching, B. E. Heterick, K. Hurley, K. E. C. Brennan, North-south patterns within arboreal ant assemblages from rain forests in Eastern Australia. *Biotropica* **33**, 643-661 (2001).
40. E. Guilbert, M. Baylac, J. Najt, Canopy arthropod diversity in a New Caledonian primary forest sampled by fogging. *Pan-Pac. Entomol.* **71**, 3-12 (1995).
41. R. Nazarreta *et al.*, Rainforest conversion to smallholder plantations of rubber oil palm leads to species loss and community shifts in canopy ants (Hymenoptera: Formicidae). *Myrmecol. News* **30**, 175-186 (2020).
42. Y. B. Srinivasa, A. N. Arun Kumar, K. D. Prathapan, Canopy arthropods of *Vateria indica* L. and *Dipterocarpus indicus* Bedd. in the rainforests of Western Ghats, South India. *Curr. Sci.* **86**, 1420-1426 (2004).
43. A. Schulz, T. Wagner, Influence of forest type and tree species on canopy ants (Hymenoptera: Formicidae) in Budongo Forest, Uganda. *Oecologia* **133**, 224-232 (2002).
44. D. Leston, The ant mosaic - tropical tree crops and the limiting of pests and diseases. *Pest Articles & News Summaries* **19**, 311-341 (1973).
45. J. D. Majer, The abundance and diversity of arboreal ants in Northern Australia. *Biotropica* **22**, 191-199 (1990).
46. A. D. Watt, N. E. Stork, M. C., G. L. Lawson, Impact of forest management on insect abundance and damage in a lowland tropical forest in Southern Cameroon. *J. Appl. Ecol.* **34**, 985-998 (1997).
47. I. Perfecto, J. Vandermeer, P. Hanson, V. Cartín, Arthropod biodiversity loss and the transformation of a tropical agro-ecosystem. *Biodivers. Conserv.* **6**, 935-945 (1997).
48. Y. Basset, The taxonomic composition of the arthropod fauna associated with an Australian rainforest tree. *Aust. J. Zool.* **39**, 171-190 (1991).
49. T. R. E. Southwood, V. C. Moran, C. E. J. Kennedy, The richness, abundance and biomass of the arthropod communities on trees. *J. Anim. Ecol.* **51**, 635-649 (1982).
50. R. C. Swart, M. J. Samways, F. Roets, Tree canopy arthropods have idiosyncratic responses to plant ecophysiological traits in a warm temperate forest complex. *Sci Rep* **10**, 19905 (2020).
51. R. M. Chew, Estimation of ant colony size by the Lincoln Index method. *J. N. Y. Entomol. Soc.* **67**, 157-161 (1959).



52. G. L. Ayre, Problems in using the Lincoln Index for estimating the size of ant colonies (Hymenoptera: Formicidae). *J. N. Y. Entomol. Soc.* **70**, 159-166 (1962).
53. H. G. Fowler, Colony-level regulation of forager caste ratios in response to caste perturbations in the Carpenter Ant, *Camponotus pennsylvanicus* (de Geer) (Hymenoptera: Formicidae). *Insect. Soc.* **31**, 461-472 (1984).
54. K. Horstmann, Die Energiebilanz der Waldameisen (*Formica polyctena* Forster) in einem Eichenwald. *Insect. Soc.* **29**, 402-421 (1982).
55. M. Kruk-de Bruin, L. C. M. Rost, F. G. A. M. Draisma, Estimation of the number of foraging ants with the Lincoln-Index method in relation to the colony size of *Formica polyctena*. *J. Anim. Ecol.* **46**, 457-470 (1977).
56. A. G. H. Eow, A. S. C. Chong, C.-Y. Lee, Behavioral plasticity in polyethism of *Monomorium* spp. (Hymenoptera: Formicidae). *Sociobiology* **43**, 557-564 (2004).
57. L. M. Hart, W. R. Tschinkel, A seasonal natural history of the ant, *Odontomachus brunneus*. *Insect. Soc.* **59**, 45-54 (2011).
58. F. B. Golley, J. B. Gentry, Bioenergetics of the Southern Harvester Ant, *Pogonomyrmex badius*. *Ecology* **45**, 217-225 (1964).
59. S. D. Porter, C. D. Jorgensen, Foragers of the Harvester Ant, *Pogonomyrmex owheeii*: a disposable caste? *Behav. Ecol. Sociobiol.* **9**, 247-256 (1981).
60. W. P. MacKay, A comparison of the nest phenologies of three species of *Pogonomyrmex* harvester ants (Hymenoptera: Formicidae). *Psyche* **88**, 25-74 (1981).
61. J. M. Erickson, Mark-recapture techniques for population estimates of *Pogonomyrmex* ant colonies: an evaluation of the <sup>32</sup>P technique. *Ann. Entomol. Soc. Am.* **65**, 57-61 (1972).
62. L. Rogers, R. Lavigne, J. L. Miller, Bioenergetics of the Western Harvester Ant in the Shortgrass Plains ecosystem. *Environ. Entomol.* **1**, 763-768 (1972).
63. B. E. Nobua-Behrmann, J. Lopez de Casenave, F. A. Milesi, B. Pavan, Forager abundance and its relationship with colony activity level in three species of South American *Pogonomyrmex* harvester ants. *Insect. Soc.* **60**, 243-249 (2013).
64. D. Charbonneau, T. Sasaki, A. Dornhaus, Who needs 'lazy' workers? Inactive workers act as a 'reserve' labor force replacing active workers, but inactive workers are not replaced when they are removed. *PLoS One* **12**, e0184074 (2017).
